# Supplementary material
Source: PubMed Central journal article supplement (PMC3864457)
Supplement: 10-1055-s-0032-1328502-sup_de_gf616.pdf [file 10-1055-s-0032-1328502-sup_de_gf616.pdf]

# Bisphosphonate und ihre Rolle in der Therapie des Mammakarzinoms – Ergebnisse aus der Biobank PATH

## Bisphosphonates and their Role in Therapy for Breast Cancer – Results from the PATH Biobank

### Autoren

E.-M. Fick<sup>1</sup>, T. Anzeneder<sup>2</sup>, A. Katalinic<sup>1,3</sup>, A. Waldmann<sup>1</sup>

### Institute

<sup>1</sup> Institut für Sozialmedizin und Epidemiologie, UKSH Campus Lübeck, Lübeck

<sup>2</sup> Stiftung PATH Patients' Tumor Bank of Hope, München

<sup>3</sup> Institut für Krebs Epidemiologie, Lübeck

### Schlüsselwörter

- Bisphosphonate
- Brustkrebs
- Therapie
- Biobank

### Key words

- bisphosphonates
- breast cancer
- therapy
- biobank

### Zusammenfassung

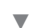

**Einleitung:** Die Bisphosphonate sind vor allem für ihren Einsatz bei der Behandlung einer Osteoporose bekannt. In der Therapie des Mammakarzinoms spielen sie als begleitende Therapie bei fortgeschrittenen, auf das Skelett ausgedehnten Tumorerkrankungen eine wichtige Rolle. Kontrovers diskutiert wird zurzeit der adjuvante Einsatz bei primären Brustkrebskrankungen ohne ossäre Metastasen. Das Ziel dieser Auswertung ist es, den Einsatz der Bisphosphonate in der Therapie des Mammakarzinoms zu beschreiben. Es soll gezeigt werden, wie oft die Bisphosphonate eingesetzt werden, welche Bisphosphonate bevorzugt eingesetzt werden und welche besonderen Merkmale Patientinnen mit einer Bisphosphonattherapie aufweisen.

**Methoden und Materialien:** Für die Auswertung wurde der pseudonymisierte Datensatz aus der Biobank der deutschen Stiftung PATH verwendet. Aus dem Gesamtkollektiv wurden unter Berücksichtigung der Ein- und Ausschlusskriterien 2492 Patientinnen ausgewählt. Das ausgewählte Patientenkollektiv wurde in 2 Gruppen (mit und ohne Bisphosphonattherapie) aufgeteilt und mithilfe der deskriptiven Statistik miteinander verglichen.

**Ergebnisse:** 17,5% der 2492 Patientinnen wurde im Rahmen der Therapie ein Bisphosphonat verordnet. Das am häufigsten eingesetzte Bisphosphonat war Zoledronat. Die pathologische (tumorthherapieinduzierte) Osteoporose war die am häufigsten genannte Indikation unter den Bisphosphonat-Patientinnen, gefolgt von der Einnahme bereits vor der Brustkrebstherapie und der Behandlung von Knochenmetastasen. Patientinnen mit Bisphosphonat- und Antihormontherapie erhielten häufiger einen Aromatasehemmer als Wirkstoff der Antihormontherapie, während Patientinnen mit einer Antihormontherapie, aber ohne Bisphosphonattherapie häufiger Tamoxifen

### Abstract

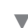

**Introduction:** Bisphosphonates are well known above all for their use in the treatment of osteoporosis. They also play an important role as accompanying therapy for advanced tumour diseases with extensive spread into the skeletal system. Their adjuvant use in the treatment of breast cancer without bony metastases is currently a subject of controversial discussion. The objective of the present evaluation is to describe the use of bisphosphonates in the therapy for breast cancer. We will show how frequently bisphosphonates are used, which bisphosphonates are preferred and what specific features patients under bisphosphonate therapy exhibit.

**Methods and Materials:** The pseudonymous data set from the biobank of the German PATH foundation was used for the evaluation. From the total collective, 2492 patients were selected after consideration of the inclusion and exclusion criteria. The selected patient collective was divided into 2 groups (with and without bisphosphonate therapy) and the 2 groups compared with one another with the help of descriptive statistics.

**Results:** 17.5% of the 2492 patients had prescriptions for a bisphosphonate as part of their therapy. The most frequently administered bisphosphonate was zoledronate. Pathological (induced by tumour therapy) osteoporosis was the most frequently stated indication among the bisphosphonate patients, followed by consumption starting prior to the breast cancer therapy and treatment of bony metastases. Patients under bisphosphonate and antihormonal therapy frequently received an aromatase inhibitor as the active principle in the antihormonal therapy whereas patients under antihormonal therapy but without bisphosphonates more frequently received tamoxifen as active principle. 10 of the 2492 patients reported receiving bisphosphonate therapy as prophylaxis for bony metastases without a docu-

eingereicht 23. 10. 2012

revidiert 14. 3. 2013

akzeptiert 15. 3. 2013

### Bibliografie

**DOI** <http://dx.doi.org/10.1055/s-0032-1328502>  
Geburtsh Frauenheilk 2013; 73: 1–10 © Georg Thieme Verlag KG Stuttgart · New York · ISSN 0016-5751

### Korrespondenzadresse

**Eva-Maria Fick**  
UKSH Campus Lübeck  
Institut für Sozialmedizin und Epidemiologie  
Ratzeburger Allee 160  
23562 Lübeck  
eva-maria.fick@uksh.de

als Wirkstoff erhielten. Eine Bisphosphonattherapie zur Vorbeugung von Knochenmetastasen ohne dokumentierte, zugelassene Indikation berichteten 10 von 2492 Patientinnen. Der Bisphosphonateinsatz im Rahmen der GAIN-, ICE-, SUCCESS- bzw. NATAN-Studie wurde von 29 der 2492 Patientinnen berichtet.

**Schlussfolgerungen:** Im PATH-Kollektiv werden die Bisphosphonate vor allem für die Behandlung einer (tumortherapieinduzierten) Osteoporose und die Behandlung von Knochenmetastasen eingesetzt. Der Einsatz im Off-Label-Use und die Studienteilnahme spielt in diesem Patientenkollektiv eine untergeordnete Rolle. Vor dem Hintergrund der unsicheren Datenlage zum adjuvanten Einsatz der Bisphosphonate ist die Entwicklung (und Anwendung) standardisierter, validierter Fragebögen zur Erhebung der Frequenz und Indikation einer Bisphosphonattherapie zu empfehlen.

## Einleitung

▼  
Brustkrebs ist bei den Frauen mit einem Anteil von 32,1% aller Krebsneuerkrankungen die häufigste Tumorerkrankung in Deutschland. Jährlich erkranken rund 72 000 Frauen und 17 200 Frauen versterben an einem Mammakarzinom [1].

Zu den Standardtherapien zählen die operative Therapie, Radiotherapie, Chemotherapie, Antihormontherapie und/oder die molekularbiologische Therapie. An die operative Therapie schließt sich häufig eine der oben genannten systemischen Therapien als adjuvante Therapie an [2]. Beim fortgeschrittenen Mammakarzinom, z. B. in der Behandlung von metastasiertem Brustkrebs, kann eine ergänzende Therapieform zur Standardbehandlung indiziert sein, z. B. mit Medikamenten aus der Wirkstoffgruppe der Bisphosphonate. Aktuell sind 4 Bisphosphonate, nämlich Zoledronat, Ibandronat, Pamidronat und Clodronat, für die Therapie von fortgeschrittenen, auf das Skelett ausgedehnten Tumorerkrankungen und die Therapie der tumorinduzierten Hyperkalzämie zugelassen [3–6]. Sie werden bei osteolytischen Metastasen, metastasenbedingten Knochenschmerzen und tumortherapie-induzierter manifester Osteoporose eingesetzt [2].

Bisphosphonate können in N-(stickstoff-)haltige (z. B. Zoledronat) und nicht N-haltige (z. B. Clodronat) Bisphosphonate differenziert werden. Die beiden Gruppen unterscheiden sich nicht nur in ihrer chemischen Struktur, sondern auch in ihrer Wirkweise. Die nicht N-haltigen Bisphosphonate werden von den Zellen in nicht hydrolysierbare, zytotoxische ATP-Analoga metabolisiert, die so ATP-abhängige Enzyme hemmen. Dadurch wird die Knochenresorption vermindert, und es kommt zur Apoptose der Osteoklasten. Die potenteren N-haltigen Bisphosphonate hingegen hemmen ein Enzym im Mevalonatzyklus und verhindern die weitere Aktivierung und Bildung von wichtigen Signalstoffen der Osteoklasten [7]. Das Fehlen der Botenstoffe hat Auswirkungen auf die Zellmorphologie, das Zytoskelett und weitere wichtige Zellmerkmale und kann zum Zelltod führen [8].

Bisphosphonate haben eine hohe Affinität zum Knochengewebe und akkumulieren unterschiedlich stark in den Knochen [8]. Lange wurde angenommen, dass Bisphosphonate ausschließlich auf die Osteoklasten wirken und dort die Knochenresorption hemmen. Jedoch sind die Produkte des Mevalonatzyklus auch für andere Zellen, einschließlich Tumorzellen, von großer Bedeutung [7]. In 2 großen, europäischen Studien (ABCSCG-12, ZO-FAST) konnte ein positiver Effekt auf die Zeitspanne bis zum ersten Auftreten eines Rezidivs (ABCSCG: ipsi-, kontralateral; ZO-FAST: nur ipsilateral) oder bis zum Tod bei gleichzeitiger Gabe von Zoledro-

ment und approved indication. Use of bisphosphonates in the course of the GAIN, ICE, SUCCESS or, respectively, NATAN trials was reported by 29 of the 2492 patients.

**Conclusions:** In the PATH collective, bisphosphonates were employed above all for the treatment of (tumour therapy-induced) osteoporosis and bony metastases. Off-label use and participation in clinical trials played only a minor role in this patient collective. Against the background of the uncertain data status for the adjuvant use of bisphosphonates, the development (and use) of standardised, validated questionnaires to record the indications for and frequency of use of bisphosphonate therapy is recommended.

nat zur Standardtherapie beim nicht metastasierten Mammakarzinom gezeigt werden [9, 10]. Die AZURE-Studie konnte hingegen keinen ausschließlichen Vorteil in Bezug auf die Häufigkeit von Rezidiven und Todesfällen jeglicher Ursachen zeigen [11]. Jedoch haben die Bisphosphonate noch keine Zulassung für die adjuvante Anwendung bei Patientinnen ohne skelettbezogene Komplikationen. Obwohl die direkte Antitumorwirkung noch nicht vollständig belegt ist und weitere Ergebnisse aus laufenden Studien abgewartet werden müssen, wird der adjuvante Einsatz der Bisphosphonate bereits von der Arbeitsgemeinschaft Gynäkologische Onkologie e.V. (AGO e.V.) empfohlen. In der im März 2011 erschienenen Leitlinie wird der Einsatz von Zoledronat beim primären Mammakarzinom für postmenopausale Patientinnen und prämenopausale Patientinnen mit alleiniger antiendokriner Therapie ausschließlich positiv bewertet [12].

Die Bisphosphonate werden beim fortgeschrittenen Mammakarzinom mit skelettbezogenen Komplikationen bereits eingesetzt, der Einsatz beim lokal begrenzten Mammakarzinom steht noch in der Diskussion. Das Ziel dieses Artikels ist es, den Einsatz und die Häufigkeit von Bisphosphonaten in der Therapie des Mammakarzinoms auf Basis der Datensammlung der Tumorbank der Stiftung PATH zu beschreiben. Es werden Unterschiede zwischen Patientinnen mit und ohne Bisphosphonattherapie analysiert.

## Material und Methoden

### ▼ PATH-Biobank

PATH, die Patients' Tumor Bank of Hope, ist eine deutsche, gemeinnützige Stiftung, die im Jahr 2002 von Brustkrebspatientinnen gegründet wurde. Ziel der Stiftung ist die Sammlung von Brustkrebsgewebe sowohl für die Patientin als auch für die Krebsforschung. Neben der Asservierung von Tumorgewebe, Normalgewebe und Serum in einer dezentral organisierten Tumorbank erhebt PATH klinische Daten zum Tumor (Übermittlung durch das jeweilige Brustzentrum), soziodemografische Daten und Informationen zum Krankheitsverlauf und zur erhaltenen Therapie (durch die Patientinnen im Rahmen der Follow-up-Befragung). Die Informationen werden in einer zentralen Datenbank gesammelt, welche die Biobank annotiert (● **Abb. 1**). PATH kooperiert zurzeit mit 7 zertifizierten Brustzentren in Deutschland (vgl. Acknowledgement; siehe auch <http://www.stiftungpath.org/kooperationspartner/kooperationskliniken>), in denen die Patientinnen rekrutiert werden.

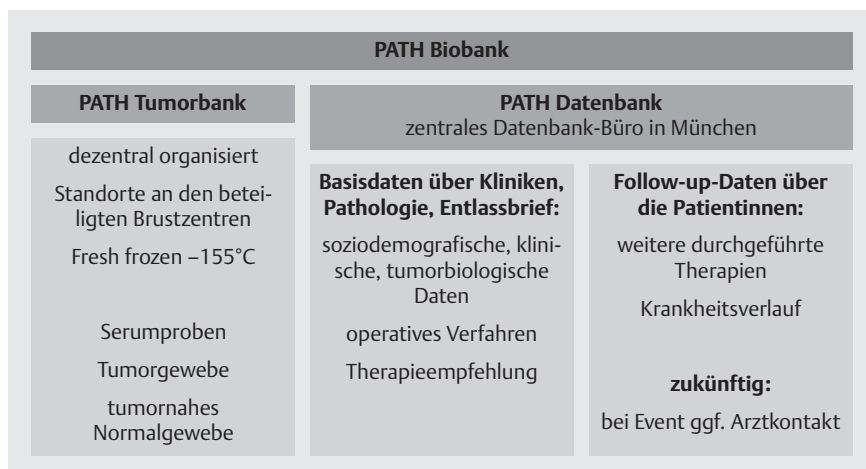

**Abb. 1** Aufbau der PATH-Biobank, Biomaterialbestand, Datenbestand.

Die Patientinnen geben je ihr schriftliches Einverständnis zur Einlagerung, späteren Kontaktaufnahme zu Nachbeobachtungszwecken und zur Datenspeicherung sowie zur Proben- und Datenweitergabe zu Forschungszwecken in pseudonymisierter Form. Der beschriebene Prozess ist einer Ethikkommission und dem Bayerischen Landesdatenschutzbeauftragten zur Begutachtung vorgelegt worden. Er wurde von der Ethikkommission der Universität Bonn zustimmend bewertet.

#### PATH-Follow-up

Seit 2009 werden die Frauen ca. 2 Jahre (Ausnahmen: Patientinnen 2004–2007, Anschreiben 3–5 Jahre nach Diagnose) nach der Diagnose per Telefon kontaktiert, bei Nichterreichten postalisch angeschrieben. Das Telefoninterview wird anhand eines standardisierten Gesprächsleitfadens durchgeführt und soll zukünftig im Abstand von 1–2 Jahren wiederholt werden. Zum Zeitpunkt der hier beschriebenen Untersuchung waren alle an PATH teilnehmenden Frauen aus den Jahren 2004 bis 2009 im Follow-up kontaktiert worden.

Während des telefonischen Follow-up-Interviews wird die Patientin u. a. nach einer möglichen Bisphosphonattherapie gefragt, ggf. werden der Grund für die Einnahme und eine mögliche Therapiepause sowie der Name des Bisphosphonats erhoben.

Vor Beginn der Datenerhebung zum Follow-up wurde durch das PATH-Studienzentrum festgelegt, dass, sofern die Patientin einen Einsatz von Bisphosphonaten bereits vor der Brustkrebserkrankung berichtet, dieser unabhängig von der Indikation (z. B. auch bei „Vorbeugung von Knochenschmerzen“) als „Einsatz vor der Brustkrebserkrankung“ dokumentiert wird. Für den Zweck dieser Auswertung wird eine Patientin in die Subgruppe der „Studienpatientinnen“ eingeordnet, wenn sie die Einnahme von Bisphosphonaten im Rahmen einer Studie zum adjuvanten Einsatz der Bisphosphonate berichtet. Wird eine Anwendung des Bisphosphonats zum Zweck der Vorbeugung von Knochenmetastasen berichtet, so wird die Patientin für die vorliegende Auswertung in die Subgruppe „Off-Label-Use“ eingeordnet.

#### Auswahl des Patientenkollektivs

Der von der PATH-Stiftung im April 2012 zur Verfügung gestellte Datensatz enthielt Informationen zu 5625 Patienten. Dieser Datensatz beinhaltete Angaben zu 22 Männern und 1436 Frauen, deren Diagnose nicht im Zeitraum 2004–2009 lag. Beide Gruppen wurden von den Auswertungen ausgeschlossen. Als Grundstudienpopulation wurden 4167 Frauen definiert, die ihre Brust-

krebsdiagnose im Zeitraum 2004 bis 2009 erhalten hatten (= potenziell erfolgtes Follow-up, siehe oben). Aus dieser Gruppe mussten 1565 Frauen wegen eines nicht erfolgten Follow-ups und weitere 110 mit fehlender/ungültiger Angabe auf die Frage zur Bisphosphonateinnahme ausgeschlossen werden.

Somit verbleiben für die Analysen 436 Patientinnen mit Bisphosphonateinnahme (BP[+]) und 2056 Patientinnen ohne Bisphosphonateinnahme (BP[-]).

Des Weiteren werden 2 Subgruppenanalysen durchgeführt. (1) Die Patientinnen, die eine Antihormontherapie erhalten haben, werden in Patientinnen mit Aromatasehemmertherapie (AI und AI plus GnRH) und in Patientinnen mit Tamoxifentherapie (TAM und TAM plus GnRH) aufgeteilt. Die beiden Gruppen werden in der Häufigkeit des Einsatzes von Bisphosphonaten und der Indikation für das verordnete Bisphosphonat miteinander verglichen. Bei dieser Subgruppe werden die Patientinnen mit einer Switch-Therapie (TAM 2 Jahre, dann AI 3 Jahre) und einer üblicherweise als erweiterte Adjuvanz bezeichneten Therapie (TAM 5 Jahre, dann AI) ausgeschlossen (n = 298). (2) Eine 2. Subgruppenanalyse wird für die Subgruppen mit unterschiedlicher Indikation zur Bisphosphonattherapie durchgeführt. Dabei wird zwischen der Studiengruppe (ICE, GAIN, NATAN, SUCCESS), der Off-Label-Use-Gruppe und der Gruppe mit „regulärer Indikation für den Einsatz von Bisphosphonaten“ unterschieden. Aufgrund der stark unterschiedlichen Fallzahl der einzelnen Gruppen erfolgt diese Auswertung rein deskriptiv.

#### Statistische Analysen

Die qualitativen Daten werden mit absoluten und relativen Häufigkeiten und die quantitativen Daten mit Mittelwerten und Standardabweichungen beschrieben. Die Daten wurden mit SPSS Version 20 ausgewertet. Mittels explorativer, univarianter Analysen ( $\chi^2$ -Test, Test nach Fisher) werden die gültigen Angaben der beiden Hauptgruppen BP(+) und BP(-) auf statistische Signifikanz geprüft. Das Signifikanzniveau wurde auf  $p=0,05$  festgelegt.

#### Ergebnisse

▼ Entsprechend der Ein- und Ausschlusskriterien reduzierte sich das Gesamtkollektiv (n = 5625) der PATH-Datenbank auf 2492 Patientinnen. Die von den Analysen ausgeschlossenen Patientinnen ohne Follow-up-Daten sind in Bezug auf das Alter repräsen-

tativ für die untersuchte Gruppe, weisen jedoch im Vergleich etwas fortgeschrittenere Erkrankungen auf (Daten nicht dargestellt).

### Einsatz der Bisphosphonate

In dem Patientenkollektiv erhielten 436 (17,5%) Patientinnen ein Bisphosphonat. Das von den Frauen am häufigsten angegebene Bisphosphonat ist das Zoledronat, gefolgt von Alendronat und Ibandronat (● Tab. 1).

Von den 436 Frauen mit Bisphosphonattherapie haben 293 (57,1%) eine Angabe zum Zeitpunkt der Einnahme gemacht. 63 Frauen berichteten eine Einnahme bereits vor der Brustkrebserkrankung, 22 Frauen berichteten eine Einnahme im Rahmen einer Studie. Außerdem berichteten 7 Frauen sowohl eine Einnahme bereits vor der Erkrankung als auch eine Studienteilnahme nach Diagnosestellung. Weitere 201 Frauen berichteten einen Beginn der Einnahme nach der operativen Therapie (● Tab. 1).

Die von den Frauen im Interview am häufigsten genannte Indikation für die Bisphosphonattherapie ist die Behandlung einer pathologischen (tumortheraPIeinduzierten) Osteoporose (48,5%), gefolgt vom Einsatz vor Beginn der Brustkrebstherapie (16,5%). Erst dann folgt die Behandlung von Knochenmetastasen (11,4%). 9,8% der Patientinnen, die ein Bisphosphonat bekommen haben, berichten die Einnahme zum Zweck der Vorbeugung von Knochenschmerzen. Eine Einnahme von Bisphosphonaten im Rahmen von Studien berichten 7,9% der Frauen. Am häufigsten wurde die Success-Studie (14/29), gefolgt von GAIN (6/29) und NATAN (7/29) genannt. Nur 2 Frauen nahmen an der ICE-Studie teil. Des Weiteren gaben 2,7% der Frauen den Off-Label-Use zur Vorbeugung von Knochenmetastasen an (● Tab. 1).

Für die Indikationen Behandlung von Knochenmetastasen oder Vorbeugung von Knochenschmerzen bzw. Gabe bereits vor Beginn der Brustkrebstherapie wird am häufigsten Zoledronat von den Patientinnen angegeben. Für den Einsatz bei einer tumortheraPIeinduzierten Osteoporose, die nach der Brustkrebsdiagnose

**Tab. 1** Einsatz der Bisphosphonate auf Basis der Patientenangaben im Follow-up (absolute und relative Häufigkeiten).

|                                                | BP (+)<br>(n = 436) |
|------------------------------------------------|---------------------|
| <b>Wirkstoff</b>                               |                     |
| Zoledronat                                     | 132 (37,0)          |
| Ibandronat                                     | 70 (19,6)           |
| Pamidronat                                     | 6 (1,7)             |
| Alendronat                                     | 94 (26,3)           |
| Risedronat                                     | 43 (12,0)           |
| Kombination 2er BP                             | 12 (3,4)            |
| unbekannt                                      | 79                  |
| <b>Zeitpunkt der BP-Einnahme</b>               |                     |
| bereits vor der Krebserkrankung                | 63 (21,5)           |
| adjuvant (postoperativ)                        | 201 (68,6)          |
| Studienteilnahme (ICE, GAIN, NATAN, SUCCESS)   | 22 (7,5)            |
| bereits vor der Erkrankung + Studienteilnahme  | 7 (2,4)             |
| unbekannt                                      | 143                 |
| <b>Indikation</b>                              |                     |
| Behandlung von Knochenmetastasen               | 42 (11,4)           |
| Behandlung von Knochenschmerzen                | 12 (3,3)            |
| präventiv (bereits vor der Erkrankung/OP)      | 61 (16,5)           |
| vorbeugend gegen Knochenschmerzen              | 36 (9,8)            |
| Behandlung einer pathologischen Osteoporose    | 179 (48,5)          |
| Studienteilnahme (ICE, GAIN, NATAN, SUCCESS)   | 29 (7,9)            |
| Off-Label-Use/Vorbeugung von Knochenmetastasen | 10 (2,7)            |
| unbekannt                                      | 69                  |

aufgetreten ist, und zur Behandlung von Knochenschmerzen wird Alendronat am häufigsten genannt (● Abb. 2).

Eine perorale Einnahme der Bisphosphonate wurde von 42 Frauen berichtet (davon 8 Frauen mit Einnahme bereits vor der Krebserkrankung, 31 Frauen mit Behandlung einer pathologischen

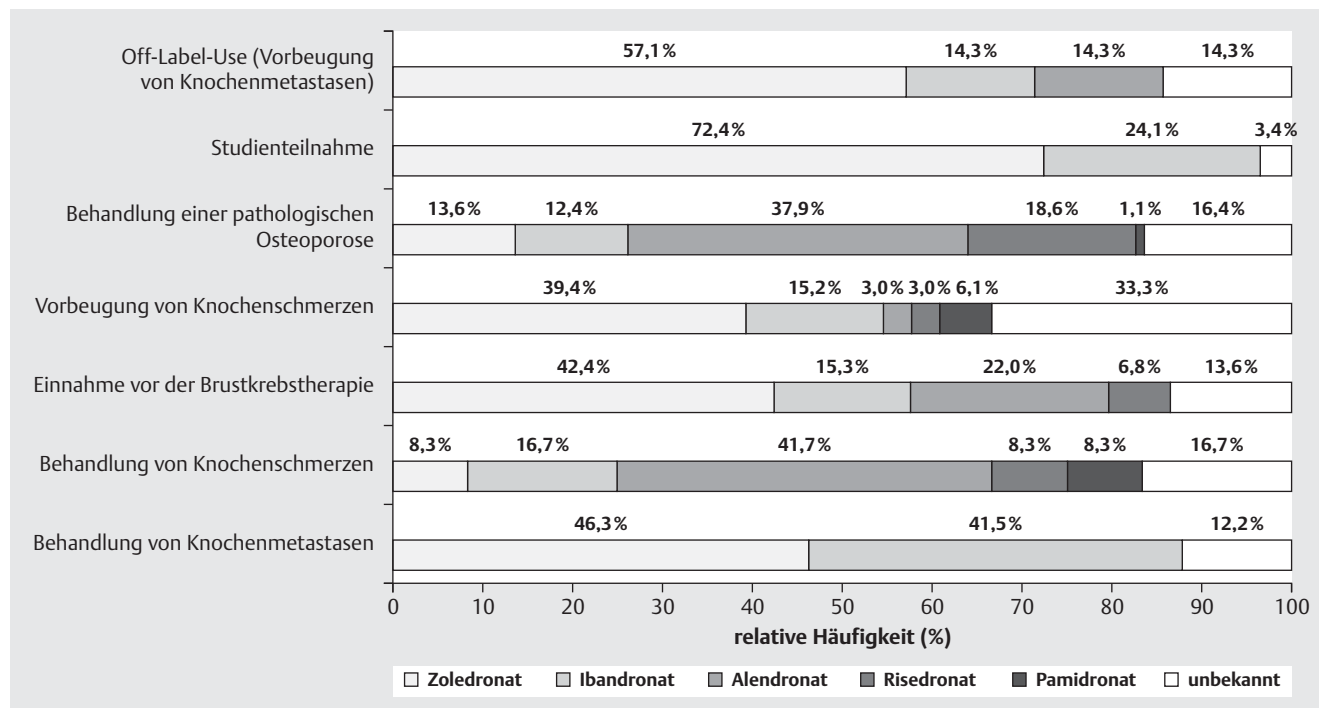

**Abb. 2** Einsatz der unterschiedlichen Bisphosphonate nach Indikation.

**Tab. 2** Patientencharakteristika, die zum Rekrutierungs-/Diagnosezeitpunkt in den Brustzentren erhoben worden sind (absolute und relative Häufigkeiten; Mittelwert und SD).

|                                        | gesamt<br>(n = 2492) | BP(-)<br>(n = 2056) | BP(+)<br>(n = 436) | p-Wert | zugelassene<br>Indikation<br>(n = 397) | Studien-<br>teilnahme<br>(n = 29) | Off-Label-<br>Use (n = 10) |
|----------------------------------------|----------------------|---------------------|--------------------|--------|----------------------------------------|-----------------------------------|----------------------------|
| Alter bei Diagnose                     | 59,6 ± 11,2          | 59,6 ± 11,2         | 59,5 ± 11,5        | 0,932  | 60,4 ± 11,3                            | 51,1 ± 9,0                        | 50,4 ± 12,1                |
| <b>Menopausenstatus</b>                |                      |                     |                    |        |                                        |                                   |                            |
| prämenopausal                          | 370 (17,1)           | 306 (17,1)          | 64 (17,3)          | 0,824  | 55 (15,9)                              | 6 (35,3)                          | 3 (37,5)                   |
| perimenopausal                         | 49 (2,3)             | 39 (2,2)            | 10 (2,7)           |        | 8 (2,3)                                | 1 (5,9)                           | 1 (12,5)                   |
| postmenopausal                         | 1743 (80,6)          | 1446 (80,7)         | 297 (80,1)         |        | 283 (81,8)                             | 10 (58,8)                         | 4 (50,0)                   |
| fehlend                                | 330                  | 265                 | 65                 |        | 51                                     | 12                                | 2                          |
| <b>ER-Status</b>                       |                      |                     |                    |        |                                        |                                   |                            |
| negativ                                | 407 (16,7)           | 326 (16,2)          | 81 (19,0)          | 0,174  | 64 (16,4)                              | 9 (32,1)                          | 8 (88,9)                   |
| positiv                                | 2037 (83,3)          | 1691 (83,9)         | 346 (81,0)         |        | 326 (83,6)                             | 19 (67,9)                         | 1 (11,1)                   |
| fehlend                                | 48                   | 39                  | 9                  |        | 7                                      | 1                                 | 1                          |
| <b>PR-Status</b>                       |                      |                     |                    |        |                                        |                                   |                            |
| negativ                                | 651 (26,6)           | 521 (25,8)          | 130 (30,3)         | 0,062  | 110 (28,1)                             | 12 (42,9)                         | 8 (80,0)                   |
| positiv                                | 1796 (73,4)          | 1497 (74,2)         | 299 (69,7)         |        | 281 (71,9)                             | 16 (57,1)                         | 2 (20,0)                   |
| fehlend                                | 45                   | 38                  | 7                  |        | 6                                      | 1                                 | 0                          |
| <b>Her2-neu</b>                        |                      |                     |                    |        |                                        |                                   |                            |
| negativ                                | 2156 (88,4)          | 1782 (88,6)         | 374 (87,6)         | 0,560  | 342 (87,9)                             | 23 (82,1)                         | 9 (90,0)                   |
| positiv                                | 282 (11,6)           | 229 (11,4)          | 53 (12,4)          |        | 47 (12,1)                              | 5 (17,9)                          | 1 (10,0)                   |
| fehlend                                | 54                   | 45                  | 9                  |        | 8                                      | 1                                 | 0                          |
| <b>Erstdiagnose</b>                    |                      |                     |                    |        |                                        |                                   |                            |
| nein                                   | 171 (6,9)            | 142 (7,0)           | 29 (6,8)           | 0,917  | 27 (6,9)                               | 2 (7,1)                           | 0 (0,0)                    |
| ja                                     | 2292 (93,1)          | 1892 (93,0)         | 400 (93,2)         |        | 364 (93,1)                             | 26 (92,9)                         | 10 (100,0)                 |
| fehlend                                | 29                   | 22                  | 7                  |        | 6                                      | 1                                 | 0                          |
| <b>Tumorgroße</b>                      |                      |                     |                    |        |                                        |                                   |                            |
| pTis                                   | 14 (0,6)             | 14 (0,7)            | 0 (0,0)            | 0,003  | 0 (0,0)                                | 0 (0,0)                           | 0 (0,0)                    |
| pT0                                    | 39 (1,6)             | 29 (1,4)            | 10 (2,3)           |        | 10 (2,6)                               | 0 (0,0)                           | 0 (0,0)                    |
| pT1                                    | 1598 (65,2)          | 1341 (66,2)         | 257 (60,1)         |        | 237 (61,1)                             | 13 (44,8)                         | 7 (70,0)                   |
| pT2                                    | 709 (28,9)           | 577 (28,5)          | 132 (30,9)         |        | 118 (30,4)                             | 11 (37,9)                         | 3 (33,0)                   |
| pT3                                    | 67 (2,7)             | 47 (2,3)            | 20 (4,7)           |        | 15 (3,9)                               | 5 (17,2)                          | 0 (0,0)                    |
| pT4                                    | 25 (1,0)             | 17 (0,8)            | 8 (1,9)            |        | 8 (2,1)                                | 0 (0,0)                           | 0 (0,0)                    |
| Tx                                     | 40                   | 31                  | 9                  |        | 9                                      | 0                                 | 0                          |
| <b>Lymphknotenbefall</b>               |                      |                     |                    |        |                                        |                                   |                            |
| pN0                                    | 1622 (67,3)          | 1378 (69,4)         | 244 (57,7)         | <0,001 | 231 (60,0)                             | 9 (32,1)                          | 4 (40,0)                   |
| pN1                                    | 569 (23,6)           | 461 (23,2)          | 108 (25,5)         |        | 98 (25,5)                              | 6 (21,4)                          | 4 (40,0)                   |
| pN2                                    | 147 (6,1)            | 98 (4,9)            | 49 (11,6)          |        | 37 (9,6)                               | 12 (42,9)                         | 0 (0,0)                    |
| pN3                                    | 71 (2,9)             | 49 (2,5)            | 22 (5,2)           |        | 19 (4,9)                               | 1 (3,6)                           | 2 (20,0)                   |
| Nx                                     | 83                   | 70                  | 13                 |        | 12                                     | 1                                 | 0                          |
| <b>Metastasierung bei Erstdiagnose</b> |                      |                     |                    |        |                                        |                                   |                            |
| pM0                                    | 2135 (98,2)          | 1779 (99,2)         | 356 (93,2)         | <0,001 | 319 (92,5)                             | 26 (100,0)                        | 10 (100,0)                 |
| pM1                                    | 40 (1,8)             | 14 (0,8)            | 26 (6,8)           |        | 26 (7,5)                               | 0 (0,0)                           | 0 (0,0)                    |
| Mx                                     | 119                  | 100                 | 19                 |        | 19                                     | 0                                 | 0                          |
| <b>Grading</b>                         |                      |                     |                    |        |                                        |                                   |                            |
| G1                                     | 323 (14,2)           | 285 (15,1)          | 38 (9,7)           | 0,017  | 37 (10,2)                              | 1 (4,3)                           | 0 (0,0)                    |
| G2                                     | 1467 (64,4)          | 1206 (63,9)         | 261 (66,8)         |        | 248 (68,3)                             | 12 (52,2)                         | 2 (33,3)                   |
| G3                                     | 487 (21,4)           | 395 (20,9)          | 92 (23,5)          |        | 78 (21,5)                              | 10 (43,5)                         | 4 (66,7)                   |
| fehlend                                | 214                  | 170                 | 44                 |        | 34                                     | 6                                 | 4                          |
| <b>Resektionsrand</b>                  |                      |                     |                    |        |                                        |                                   |                            |
| R0                                     | 2411 (98,8)          | 1994 (99,0)         | 417 (97,9)         | 0,138  | 379 (97,9)                             | 29 (100,0)                        | 9 (90,0)                   |
| R1                                     | 29 (1,2)             | 20 (1,0)            | 9 (2,1)            |        | 8 (2,1)                                | 0 (0,0)                           | 1 (10,0)                   |
| R2                                     | 1 (<0,1)             | 1 (<0,1)            | 0 (0,0)            |        | 0 (0,0)                                | 0 (0,0)                           | 0 (0,0)                    |
| fehlend                                | 51                   | 41                  | 10                 |        | 10                                     | 0                                 | 0                          |
| <b>Lymphgefäßbeteiligung</b>           |                      |                     |                    |        |                                        |                                   |                            |
| L0                                     | 1854 (77,9)          | 1552 (79,1)         | 302 (72,4)         | 0,003  | 275 (72,6)                             | 24 (85,7)                         | 3 (30,0)                   |
| L1                                     | 526 (22,1)           | 411 (20,9)          | 115 (27,6)         |        | 104 (27,4)                             | 4 (14,3)                          | 7 (70,0)                   |
| fehlend                                | 112                  | 93                  | 19                 |        | 18                                     | 1                                 | 0                          |
| <b>brusterhaltende Therapie</b>        |                      |                     |                    |        |                                        |                                   |                            |
| nein                                   | 513 (20,8)           | 385 (18,9)          | 128 (29,9)         | <0,001 | 112 (28,8)                             | 11 (37,9)                         | 5 (50,0)                   |
| ja                                     | 1950 (79,2)          | 1650 (81,1)         | 300 (70,1)         |        | 277 (71,2)                             | 18 (62,1)                         | 5 (50,0)                   |
| fehlend                                | 29                   | 21                  | 8                  |        | 8                                      | 0                                 | 0                          |

**Tab. 3** Erhaltene Therapien und Krankheitsverlauf auf Basis der Patientenangaben im Follow-up (absolute und relative Häufigkeiten).

|                                    | gesamt<br>(n = 2492) | BP(-)<br>(n = 2056) | BP(+)<br>(n = 436) | p-Wert | zugelassene<br>Indikation<br>(n = 397) | Studien-<br>teilnahme<br>(n = 29) | Off-Label-<br>Use (n = 10) |
|------------------------------------|----------------------|---------------------|--------------------|--------|----------------------------------------|-----------------------------------|----------------------------|
| <b>Chemotherapie</b>               |                      |                     |                    |        |                                        |                                   |                            |
| nein                               | 1 100 (48,3)         | 941 (49,9)          | 159 (40,5)         | 0,001  | 158 (44,5)                             | 0 (0,0)                           | 1 (11,1)                   |
| ja                                 | 1 177 (51,7)         | 943 (50,1)          | 234 (59,5)         |        | 197 (55,5)                             | 29 (100,0)                        | 8 (88,9)                   |
| fehlend                            | 215                  | 172                 | 43                 |        | 42                                     | 0                                 | 1                          |
| <b>Bestrahlung</b>                 |                      |                     |                    |        |                                        |                                   |                            |
| nein                               | 276 (11,1)           | 221 (10,8)          | 55 (12,6)          | 0,275  | 50 (12,6)                              | 4 (13,8)                          | 1 (10,0)                   |
| ja                                 | 2 215 (88,9)         | 1 834 (89,2)        | 381 (87,4)         |        | 347 (87,4)                             | 25 (86,2)                         | 9 (90,0)                   |
| fehlend                            | 1                    | 1                   | 0                  |        | 0                                      | 0                                 | 0                          |
| <b>Antihormontherapie (AHT)</b>    |                      |                     |                    |        |                                        |                                   |                            |
| nein                               | 392 (16,0)           | 319 (15,8)          | 73 (17,2)          | 0,513  | 58 (15,0)                              | 9 (31,0)                          | 6 (60,0)                   |
| ja                                 | 2 051 (84,0)         | 1 699 (84,2)        | 352 (82,8)         |        | 328 (85,0)                             | 20 (69,0)                         | 4 (40,0)                   |
| fehlend                            | 49                   | 38                  | 11                 |        | 11                                     | 0                                 | 0                          |
| <b>Medikament der AHT</b>          |                      |                     |                    |        |                                        |                                   |                            |
| AI                                 | 1 026 (53,5)         | 813 (51,1)          | 213 (65,3)         | <0,001 | 204 (67,5)                             | 7 (35,0)                          | 2 (50,0)                   |
| AI plus GnRH-Analogon              | 1 (<0,1)             | 0 (0,0)             | 1 (0,3)            |        | 0 (0,0)                                | 1 (5,0)                           | 0 (0,0)                    |
| TAM 5 Jahre, dann AI               | 4 (0,2)              | 4 (0,3)             | 0 (0,0)            |        | 0 (0,0)                                | 0 (0,0)                           | 0 (0,0)                    |
| TAM 2 Jahre, dann AI 3 Jahre       | 294 (15,3)           | 268 (16,9)          | 26 (8,0)           |        | 23 (7,6)                               | 3 (15,0)                          | 0 (0,0)                    |
| TAM                                | 409 (21,3)           | 357 (22,5)          | 52 (16,0)          |        | 44 (14,6)                              | 7 (35,0)                          | 1 (25,0)                   |
| TAM plus GnRH-Analogon             | 182 (9,5)            | 148 (9,3)           | 34 (10,4)          |        | 31 (10,3)                              | 2 (10,0)                          | 1 (25,0)                   |
| fehlend                            | 135                  | 109                 | 26                 |        | 26                                     | 9                                 | 6                          |
| <b>Herceptin</b>                   |                      |                     |                    |        |                                        |                                   |                            |
| nein                               | 2 202 (89,4)         | 1 825 (89,6)        | 377 (88,3)         | 0,437  | 344 (88,7)                             | 24 (82,8)                         | 9 (90,0)                   |
| ja                                 | 262 (10,6)           | 212 (10,4)          | 50 (11,7)          |        | 44 (11,3)                              | 5 (17,2)                          | 1 (10,0)                   |
| fehlend                            | 28                   | 19                  | 9                  |        | 9                                      | 0                                 | 0                          |
| <b>Rezidiv im Verlauf</b>          |                      |                     |                    |        |                                        |                                   |                            |
| nein                               | 2 403 (98,3)         | 1 986 (98,5)        | 417 (97,4)         | 0,143  | 383 (98,2)                             | 27 (96,4)                         | 7 (70,0)                   |
| ja                                 | 41 (1,7)             | 30 (1,5)            | 11 (2,6)           |        | 7 (1,8)                                | 1 (3,6)                           | 3 (30,0)                   |
| fehlend                            | 48                   | 40                  | 8                  |        | 7                                      | 1                                 | 0                          |
| <b>Metastasen im Verlauf</b>       |                      |                     |                    |        |                                        |                                   |                            |
| nein                               | 2 357 (96,5)         | 1 983 (98,3)        | 374 (87,8)         | <0,001 | 339 (87,4)                             | 26 (92,9)                         | 9 (90,0)                   |
| ja                                 | 85 (3,5)             | 34 (1,7)            | 51 (12,2)          |        | 49 (12,6)                              | 2 (7,1)                           | 1 (10,0)                   |
| fehlend                            | 49                   | 39                  | 10                 |        | 9                                      | 1                                 | 0                          |
| <b>Lokalisation der Metastasen</b> |                      |                     |                    |        |                                        |                                   |                            |
| Knochen                            | 38 (47,0)            | 5 (15,6)            | 34 (66,7)          | <0,001 | 33 (68,8)                              | 1 (50,0)                          | 0 (0,0)                    |
| Leber                              | 10 (12,0)            | 5 (15,6)            | 5 (9,8)            |        | 5 (10,4)                               | 0 (0,0)                           | 0 (0,0)                    |
| Lunge                              | 17 (20,5)            | 13 (40,6)           | 4 (7,8)            |        | 4 (8,3)                                | 0 (0,0)                           | 0 (0,0)                    |
| Gehirn                             | 9 (10,8)             | 6 (18,8)            | 3 (5,9)            |        | 3 (6,2)                                | 0 (0,0)                           | 0 (0,0)                    |
| Pleura                             | 1 (1,2)              | 0 (0,0)             | 1 (2,0)            |        | 0 (0,0)                                | 1 (50,0)                          | 0 (0,0)                    |
| Knochenmark                        | 1 (1,2)              | 0 (0,0)             | 1 (2,0)            |        | 1 (2,1)                                | 0 (0,0)                           | 0 (0,0)                    |
| anderes Organ                      | 6 (7,2)              | 3 (9,4)             | 3 (5,9)            |        | 2 (4,2)                                | 0 (0,0)                           | 1 (100,0)                  |
| fehlend                            | 3                    | 1                   | 0                  |        | 1                                      | 0                                 | 0                          |

Osteoporose und eine Frau, die Ibandronat zur Behandlung von Knochenmetastasen angegeben hat).

Unter den 12 Frauen, die 2 Präparate angegeben hatten, gaben 7 Patientinnen einen Wechsel des Bisphosphonats an. In 2 Fällen war der Grund für die Einnahme 2 unterschiedlicher Bisphosphonate nicht bekannt. In einem Fall gab die Patientin an, dass Zoledronat und Pamidronat seit 2009 im Wechsel zur Vorbeugung von Knochenmetastasen gegeben wurde.

### Subgruppenanalysen Bisphosphonattherapie

Es bestehen zum Teil deutliche Unterschiede zwischen den Patientinnen mit und ohne Bisphosphonattherapie (● Tab. 2). Das vom Brustzentrum angegebene TNM-Stadium (Tumorgröße, lokaler Lymphknotenbefall, Metastasenbildung bei Erstdiagnose) ist bei Frauen mit Bisphosphonateinnahme fortgeschrittener. Bei den Patientinnen mit Bisphosphonateinnahme wurde seltener eine brusterhaltende Operation durchgeführt. Außerdem werden von den Frauen mit Bisphosphonattherapie öfter Fernmetastasen

angegeben, welche bei den Patientinnen mit Bisphosphonateinnahme mit 66,7% am häufigsten das Knochengewebe befallen (● Tab. 3). Es ist zu beachten, dass der hohe Einsatz der Bisphosphonate bei metastasiertem Brustkrebs durch die vorhandenen Fernmetastasen bedingt ist (confounding by indication).

Die Frauen, die im Telefoninterview angegeben haben, dass bei ihnen das Bisphosphonat im Off-Label-Use, d. h. vorbeugend gegen Knochenmetastasen eingesetzt wurde (BP[+]-Off-Label-Use; n = 10), sind im Durchschnitt 10 Jahre jünger als die Frauen ohne Bisphosphonattherapie bzw. mit anderer Bisphosphonatindikation (● Tab. 2). Sie sind außerdem deutlich häufiger ER-/PR-negativ und haben eine günstigere Tumorstadienverteilung. Dennoch wurden nur 50,0% brusterhaltend operiert. Außerdem berichteten 3 dieser Frauen ein Rezidiv und 1 Frau Fernmetastasen im Follow-up (● Tab. 3).

Frauen, die an der ICE-, GAIN-, NATAN- oder SUCCESS-Studie teilgenommen hatten, waren im Mittel 8 Jahre jünger als die Vergleichsgruppen BP(-)/BP(+) (gesamt) und BP mit zugelassener In-

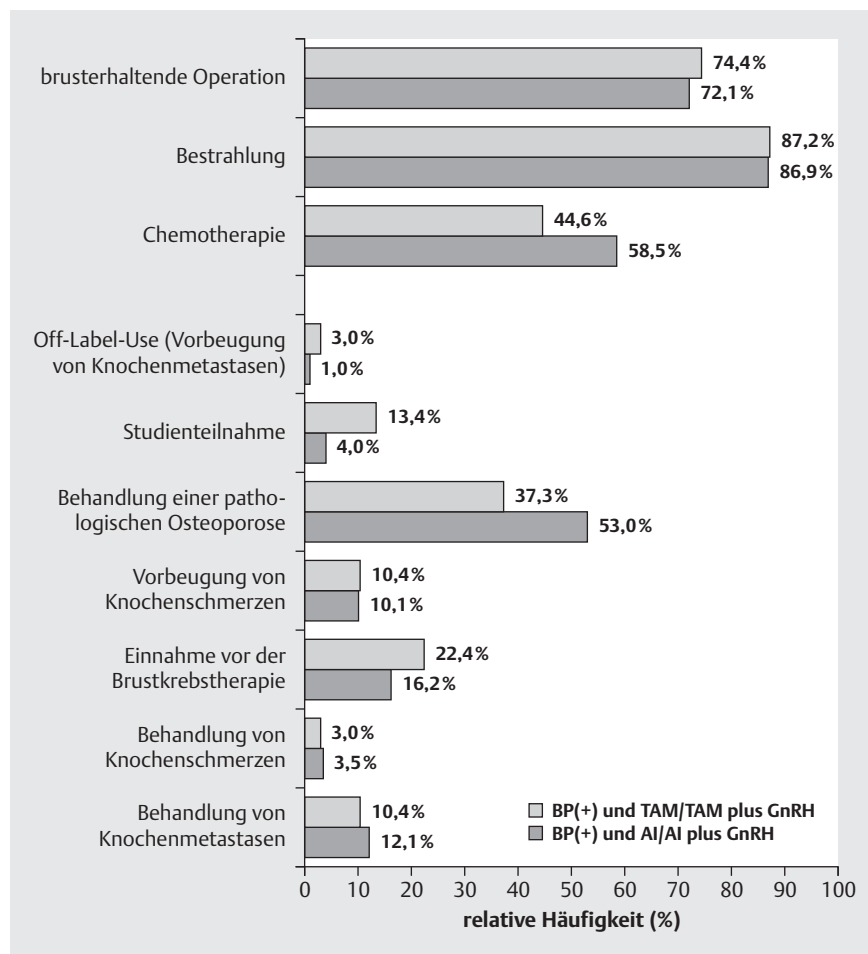

**Abb. 3** Vergleich der Frauen mit Bisphosphonattherapie (BP[+]) mit Tamoxifen bzw. mit Aromatasehemmer.

dikation. 32,1% und 42,9% waren ER- bzw. PR-negativ. Obwohl die Tumorstadienverteilung günstiger ausfiel als in den Vergleichsgruppen, wiesen diese Frauen häufiger einen Lymphknotenbefall auf; so waren nur 32,1% frei von Absiedelungen in den Lymphknoten. Der Anteil brusterhaltend operierter Frauen lag bei 62,1%. Rezidive und Metastasen im Verlauf wurden während des Follow-ups nur von 1 Frau bzw. 2 Frauen berichtet. Von den 29 Studienteilnehmerinnen erhielten 72,4% Zoledronat. Alle Studienteilnehmerinnen berichten eine Chemotherapie.

### Subgruppenanalysen Antihormontherapie

Bei der Betrachtung der Gruppe von Frauen mit Antihormontherapie zeigt sich, dass im Vergleich mehr Patientinnen mit gleichzeitiger Bisphosphonattherapie im Follow-up-Interview ausschließlich einen Aromatasehemmer als Brustkrebstherapeutikum angegeben haben (● **Tab. 3**). Eine Gegenüberstellung der Patientinnen mit Bisphosphonat- und Aromatasehemmertherapie (mittleres Alter: 63,3 ± 9,12 Jahre) mit denen unter einer Bisphosphonat- und Tamoxifentherapie (mittleres Alter: 52,5 ± 13,2 Jahre) zeigt Unterschiede hinsichtlich der weiteren Therapien und der Indikation für die Bisphosphonattherapie auf. Patientinnen unter Bisphosphonat- und Tamoxifentherapie berichteten häufiger, das Bisphosphonat im Rahmen von klinischen Studien erhalten zu haben bzw. das Bisphosphonat bereits vor der Brustkrebserkrankung eingenommen zu haben. Andererseits nannten sie seltener als Patientinnen mit Bisphosphonat- und Aromatasehemmertherapie die Behandlung einer pathologischen (tumortheraieinduzierten) Osteoporose als Indikation

für die Bisphosphonattherapie (● **Abb. 3**). Auch die Chemotherapie wird von den Frauen unter Bisphosphonat- und Aromatasehemmertherapie häufiger genannt.

### Diskussion

▼ Auf Basis des Kollektivs der Biobank PATH wurde der Einsatz der Bisphosphonate bei Patientinnen mit Mammakarzinom untersucht.

Weniger als 20% der befragten Patientinnen berichteten eine Bisphosphonattherapie. Das Zoledronat wurde mit 37,0% am häufigsten von den Patientinnen angegeben. Mit Ausnahme der Indikationen, Behandlung einer pathologischen Osteoporose und „Behandlung von Knochenschmerzen“ war es das am häufigsten genannte Bisphosphonat bei allen anderen Indikationsstellungen. Alendronat ist eines der Medikamente zur Behandlung einer tumortherapieinduzierten Osteoporose, bei dem die fraktursenkende Wirkung mit am besten belegt ist [13]. Auch von den PATH-Frauen wird Alendronat für die Behandlung der während einer Tumorerkrankung entwickelten Osteoporose (tumortheraieinduzierte Osteoporose) am häufigsten angegeben, wohingegen für die Behandlung von Knochenmetastasen das dafür zugelassene Bisphosphonat Zoledronat am häufigsten genannt wurde. Das ausschließlich oral verfügbare Clodronat wurde von den PATH-Frauen nicht genannt, obwohl die Indikation zur Behandlung beim metastasierten Mammakarzinom besteht [4]. Es konnte gezeigt werden, dass von den 42 Frauen, die ein

oral verfügbares Bisphosphonat erhielten, nur einmal die Indikation zur Behandlung von Knochenmetastasen berichtet wurde (Ibandronat). Die orale Applikation von Bisphosphonaten ist mit Nebenwirkungen verbunden und durch eine schlechte Bioverfügbarkeit des jeweiligen Bisphosphonats gekennzeichnet. Ein möglicher Grund für den geringen Einsatz oral verfügbarer Bisphosphonate bei der Behandlung von Knochenmetastasen oder Knochenschmerzen könnte sein, dass die aufwendigere i.v. Applikation bei Brustkrebspatientinnen häufig z. B. mit der Chemotherapie verknüpft werden kann.

Die Unterschiede zwischen den Subgruppen mit bzw. ohne Bisphosphonattherapie hinsichtlich der vom Brustzentrum übermittelten Patientenmerkmale sind durch die Indikationen der Bisphosphonate zu erklären. In der BP(+)-Gruppe ist das TNM-Stadium fortgeschrittener. Es tritt im Vergleich zur BP(-)-Gruppe häufiger ein Lymphknotenbefall und Fernmetastasen bei Erstdiagnose auf. Auch im Follow-up werden in der Gruppe mit Bisphosphonateinnahme häufiger Fernmetastasen angegeben, die in mehr als 50% der Fälle das Knochengewebe befallen. Die Ergebnisse bestätigen, dass bei vorhandenen Knochenmetastasen bevorzugt Bisphosphonate zur Behandlung eingesetzt werden. Allerdings zeigt die Auswertung auch, dass die Bisphosphonate bei Mammakarzinompatientinnen hauptsächlich zur Behandlung einer tumortherapieinduzierten Osteoporose eingesetzt werden (● **Tab. 1**). Der Einsatz der Bisphosphonate zur Behandlung der Osteoporose hat sich in den 1990er-Jahren etabliert und sich zur Therapie der ersten Wahl entwickelt. Die Wirksamkeit der Bisphosphonate konnte in verschiedenen Studien bestätigt werden [14]. Die Standardtherapien wie Chemotherapie und Antihormontherapie führen häufig zu einer verfrühten Menopause, einem Knochendichteverlust und einem erhöhten Knochenumbau, gleich dem Krankheitsbild der manifesten Osteoporose [15, 16].

Wie erwartet zeigen die Ergebnisse, dass unter den Patientinnen mit angegebener Antihormontherapie und gleichzeitig genannter Bisphosphonateinnahme häufiger ausschließlich ein Aromatasehemmer eingesetzt wird als bei den Patientinnen, die eine alleinige Antihormontherapie berichteten. Die Aromatasehemmer gehören zu den neueren Wirkstoffgruppen in der Brustkrebstherapie und werden vor allem bei postmenopausalen hormonrezeptorpositiven Patientinnen eingesetzt [2]. Eine genauere Betrachtung der Patientinnen mit Bisphosphonat- und Aromatasehemmereinnahme zeigt, dass die Frauen mit Aromatasehemmertherapie im Gegensatz zu den Frauen mit Bisphosphonat- und Tamoxifentherapie häufiger eine Chemotherapie erhielten. Die Patientinnen mit Bisphosphonat- und Aromatasehemmertherapie sind im Mittel fast 10 Jahre älter, was durch den bevorzugten Einsatz der Aromatasehemmer bei postmenopausalen Patientinnen zu erklären ist [2]. Patientinnen mit einer Aromatasehemmertherapie unterliegen einem höheren Risiko von skelettbezogenen Komplikationen als Patientinnen mit einer Tamoxifentherapie [17]. Dies macht deutlich, dass bei diesen Patientinnen die Gefahr einer pathologischen (tumortherapieinduzierten) Osteoporose größer ist als bei Patientinnen mit alternativer Antihormontherapie. Die E-ZO-FAST-Studie und andere Studien konnten zeigen, dass der vermehrte Einsatz der Bisphosphonate bei Patientinnen mit Aromatasehemmertherapie zu einer Zunahme der Knochendichte führt und so das Auftreten von skelettbezogenen Komplikationen senkt [16, 18]. Jedoch ist zu berücksichtigen, dass die PATH-Frauen mit Aromatasehemmertherapie und Bisphosphonattherapie im Durchschnitt 60 Jahre alt und vorwiegend postmenopausal waren. Damit waren bereits 2 von

der Tumortherapie unabhängige Risikofaktoren für eine Osteoporose erfüllt. Außerdem wird bei bestehender Aromatasehemmerindikation in der Regel eine Knochendichtemessung durchgeführt, um das Osteoporoserisiko zu ermitteln und um mögliche Präventionsmaßnahmen einzuleiten [2]. Dies kann dazu führen, dass die Osteoporose früher und häufiger diagnostiziert wird als bei Patientinnen mit Tamoxifentherapie.

In letzter Zeit wird vermehrt der ohne dokumentierte Indikation zulassungsüberschreitende, adjuvante Einsatz der Bisphosphonate beim primären Mammakarzinom diskutiert. Für diesen neuen Therapieansatz hat aktuell keines der auf dem Markt befindlichen Bisphosphonate eine Zulassung. Im Dezember 2010 zog Novartis® den Antrag auf Erweiterung der Zulassung zurück. Das Committee for Medicinal Products for Human Use (CHMP) der European Medicines Agency (EMA) konnte zu dem Zeitpunkt eine Erweiterung der Zulassung nicht empfehlen, da ein Vorteil noch nicht ausreichend belegt werden konnte [19]. Die Arbeiten zur Erfassung der Follow-up-Daten der PATH-Stiftung begannen im Jahr 2008 und erst im Jahr 2009 wurde die Datenerhebung des Follow-ups begonnen. Der Einsatz beim primären Mammakarzinom wurde damals noch nicht so stark wie heute diskutiert. Viele größere Studien waren noch nicht abgeschlossen und nur wenige Ergebnisse lagen vor. Daher wurde die Frage nach dem adjuvanten Einsatz der Bisphosphonate in die Datenerhebung der PATH-Stiftung nicht mit aufgenommen. Für die Auswertung in dieser Arbeit wurde die Information zum Einsatz beim primären Mammakarzinom ohne zugelassene Indikation aus dem Freitext zur Follow-up Dokumentation entnommen. Daher ist zu berücksichtigen, dass gegebenenfalls einige Patientinnen aufgrund fehlender Freitextangaben nicht identifiziert werden konnten. Des Weiteren ist zu beachten, dass in unserer Auswertung, aufgrund der oben beschriebenen, fehlenden Daten in der Tumorbank, Vorbeugung von Knochenmetastasen als Definition für den Off-Label-Use und die Angabe der Teilnahme an der GAIN-, ICE-, NATAN- oder SUCCESS-Studie zum adjuvanten Einsatz der Bisphosphonate als Definition für die Studienteilnahme verwendet wurde. Trotzdem wurde ein Vergleich zwischen den Patientinnen unter Bisphosphonattherapie mit Off-Label-Use/Vorbeugung von Knochenmetastasen, der Studienteilnahme-Gruppe und den Patientinnen unter Bisphosphonattherapie mit zugelassener Indikation gezogen. Die Auswertung zeigt, dass die Frauen im Off-Label-Use/Vorbeugung von Knochenmetastasen im Durchschnitt 10 Jahre jünger sind. Der Antrag auf Erweiterung der Zulassung der Firma Novartis wurde für die Behandlung von hormonrezeptorpositiven Tumoren gestellt [19]. Allerdings sind die PATH-Frauen der Off-Label-Gruppe vermehrt hormonrezeptornegativ. Die Gründe dafür, dass trotz leicht günstigerem TNM-Stadium nur 50% der Frauen mit Off-Label-Use-Angabe brusterhaltend therapiert wurden, sind aus den vorhandenen Daten leider nicht erkenntlich. Auch die Gruppe der Studienteilnehmerinnen sind im Durchschnitt ca. 8 Jahre jünger. Möglicherweise sind jüngere Frauen offener gegenüber neuen Therapieansätzen und stimmen einer Empfehlung ihres Arztes (zur Studienteilnahme oder zur vorbeugenden Einnahme von Bisphosphonaten) häufiger zu. Außerdem ist denkbar, dass jüngeren Frauen mit einem fortgeschritteneren Lymphknotenbefall diese Therapien häufiger angeboten werden. Eine genaue Aussage über die Häufigkeiten und die Patienteneigenschaften des Off-Label- bzw. Studieneinsatzes kann aufgrund der oben genannten Punkte nicht gemacht werden. Bei der Off-Label-Anwendung müssen aufgrund der fehlenden Zulassung die Patientinnen die teure Therapie selbst bezahlen, da ein Off-Label-Use nur in begründeten Ausnahmefällen



von den Krankenkassen übernommen wird. Die unklare Studienlage und der finanzielle Gesichtspunkt sind Aspekte, die vermutlich gegen eine vorbeugende Bisphosphonattherapie sprechen.

Eine der Stärken in der von uns durchgeführten Versorgungsstudie ist die Größe des Kollektivs, das mit insgesamt 2492 Patientinnen aussagekräftige Ergebnisse liefern kann. Eine weitere Stärke der Studie ist, dass sie in Kooperation der deutschen Stiftung PATH und den rekrutierenden Zentren sowie einer externen Auswertungsstelle durchgeführt wurde. Zu den Schwächen der Studie zählt, dass die Studienteilnehmerinnen der PATH-Stiftung möglicherweise leicht von einem Normalkollektiv abweichen (jüngeres Erkrankungsalter, andere Tumorstadienverteilung als alle Brustkrebspatientinnen in Deutschland [1]). Außerdem basieren die Daten zum Teil auf selbstberichteten Patientenangaben, sodass die hier betrachtete Fragestellung (Einsatz von Bisphosphonaten) nicht anhand der Klinik- oder ärztlich bestätigten Daten beantwortet werden konnte. Jedoch zeigen andere Versorgungsstudien, dass Patienten und insbesondere Brustkrebspatientinnen valide [20] und reliabel [21–23] über ihre Therapie Auskunft geben können. Ein weiteres Problem stellt die Angabe zur tumortherapieinduzierten Osteoporose dar. Aus den Daten ist nicht zu erkennen, ob die Osteoporose vermehrt durch die häufig durchgeführte Knochendichtemessung bei einer Aromatasehemmerindikation entdeckt wurde und schon vor der Tumortherapie bestand oder ob sie tatsächlich durch die Tumortherapie entstanden ist. Auch die Erfassung zum Off-Label-Use/Vorbeugung von Knochenmetastasen und die Angaben zur Gruppe der Studienteilnehmerinnen sind wie oben erwähnt nicht durch direkte Datenerhebung mittels standardisierter, validierter Fragen erfasst worden, sondern wurden aus den Freitextangaben ermittelt, was die Aussagekraft der Ergebnisse zum Einsatz ohne zugelassene Indikation abschwächt.

## Fazit

Auf Basis der Daten aus dem PATH-Kollektiv kann vermutet werden, dass die Bisphosphonate in der Therapie des Mammakarzinoms noch immer vor allem für die Behandlung skelettbezogener Komplikationen eingesetzt werden. Auch unter den PATH-Brustkrebspatientinnen ist die tumortherapieinduzierte Osteoporose einer der Hauptgründe für ihren Einsatz. Der Einsatz im Off-Label-Use und die Studienteilnahme spielt in diesem Patientenkollektiv eine untergeordnete Rolle. Vor dem Hintergrund der unsicheren Datenlage zum adjuvanten Einsatz ist die Entwicklung (und Anwendung) standardisierter, validierter Fragebögen zur Erhebung der Frequenz und Indikation einer Bisphosphonattherapie zu empfehlen.

## Danksagung

Es sei allen Patientinnen, die sich bereit erklären, Proben in PATH einzulagern und die ihre „Krankheitsgeschichte“ mit uns teilen, herzlich gedankt. Ohne ihre Unterstützung wäre diese Forschungsarbeit nicht möglich. Außerdem sei allen beteiligten Gynäkologen und Pathologen in den kooperierenden Zentren in Bonn (PATH-Ansprechpartner: Prof. Dr. Uwe-Jochen Göhring, Prof. Dr. Walter Kuhn), Dortmund (PD Dr. Georg Kunz), Bochum/Herne (Prof. Dr. Clemens Tempfer, Dr. H.Y. Ergönenc), Kassel (Prof. Dr. Thomas Dimpfl), Marburg (Prof. Dr. Ute-Susann Albert),

Offenbach (Prof. Dr. Christian Jackisch) und Regensburg (Prof. Dr. Olaf Ortmann) (siehe auch <http://www.stiftung-path.org/kooperationspartner/kooperationskliniken>) für ihr Engagement gedankt.

Frau Dr. Elke Faust danken wir für die kritische Durchsicht des Manuskripts.

## Interessenkonflikt

Die Stiftung PATH wird durch Spenden und Sponsoring von Privatpersonen und Unternehmen in der Finanzierung des Aufbaus und des Unterhalts unterstützt, dies trägt zu einem Teil der Tumor- und Datenbank bei. Auch ihnen gilt unser Dank. Zu den Spendern und/oder Sponsoren gehören: Amgen, München; AstraZeneca, Wedel; Hans Anzeneder, Burghausen; Bristol-Myers Squibb, München; Prof. Reinhard Büttner, Universität Bonn; Förderverein Robert Janker Krebsstiftung e.V., Bonn; Glaxo-SmithKline, München; Henkel Stiftung, Düsseldorf; MammaMia, das Brustkrebsmagazin; Dr. Patrizia Mikulcik, Bad Homburg; Notare Zimmermann und Hauschild, Düsseldorf; Novartis Pharma, Nürnberg; Pfizer Oncology, Berlin; Pierre Fabre, Freiburg; Revierinitiative Bochum Herne; Roche Pharma, Grenzach; Unterweger Healthcare Communication, Hamburg (siehe auch <http://www.stiftungpath.org/kooperationspartner>). Ein Interessenkonflikt liegt in dieser Arbeit jedoch nicht vor, da diese Auswertung durch eine externe und unabhängige Stelle vorgenommen wurde (Institut für Sozialmedizin und Epidemiologie; Institut für Krebs-epidemiologie e.V.). Es gab durch die Privatpersonen und Unternehmen, die PATH unterstützen, keinerlei nicht finanzielle oder finanzielle Unterstützung bezüglich dieser Auswertung. Die externe Auswertungsstelle (E. Fick, A. Waldmann, A. Katalinic) stand in keinerlei Kontakt zu den unterstützenden Unternehmen und Privatpersonen.

## Literatur

- 1 Kaatsch P, Spix C, Katalinic A et al. Krebs in Deutschland 2007/2008. 8. Aufl. Robert Koch-Institut und die Gesellschaft der epidemiologischen Krebsregister in Deutschland e.V.; 2012: 134
- 2 Kreienberg R, Albert U, Follmann M et al. Interdisziplinäre S3-Leitlinie für die Diagnostik, Therapie und Nachsorge des Mammakarzinoms. In: Leitlinienprogramm Onkologie der AWMF, Deutschen Krebsgesellschaft e.V. und Deutschen Krebshilfe e.V.; 2012. [http://www.krebsgesellschaft.de/wub\\_llevidenzbasiert,78264.html](http://www.krebsgesellschaft.de/wub_llevidenzbasiert,78264.html)
- 3 Rote Liste® Service GmbH. Fachinfo Zometa 4 mg/5 ml. Rote Liste Service GmbH; 2011. <http://www.fachinfo.de/data/fi/jsearch?praep; Stand: 03.11.2011>
- 4 Rote Liste® Service GmbH. Fachinfo Ostac 520 mg. Rote Liste Service GmbH; 2011. <http://www.fachinfo.de/data/fi/jsearch?praep; Stand: 03.11.2011>
- 5 Rote Liste® Service GmbH. Fachinfo Bondronat. Rote Liste Service GmbH; 2011. <http://www.fachinfo.de/data/fi/jsearch?praep; Stand: 03.11.2011>
- 6 Rote Liste® Service GmbH. Fachinfo Aredia. Rote Liste Service GmbH; 2011. <http://www.fachinfo.de/data/fi/jsearch?praep; Stand: 03.11.2011>
- 7 Holen I, Coleman RE. Bisphosphonates as treatment of bone metastases. *Current Pharmaceutical Design* 2010; 16: 1262–1271
- 8 Russell RG. Bisphosphonates: mode of action and pharmacology. *Pediatrics* 2007; 119 (Suppl. 2): S150–S162
- 9 Gnant M, Mlineritsch B, Stoeger H. Adjuvant endocrine therapy plus zoledronic acid in premenopausal women with early-stage breast cancer: 62-month follow-up from the ABCSG-12 randomised trial. *Lancet Oncol* 2011; 12: 631–641

- 10 *Eidtmann H, Boer de R, Bundred N et al.* Efficacy of zoledronic acid in postmenopausal women with early breast cancer receiving adjuvant letrozole: 36-month results of the ZO-FAST Study. *Ann Oncol* 2010; 21: 2188–2194
- 11 *Coleman RE, Marshall H, Cameron D et al.* Breast-cancer adjuvant therapy with zoledronic acid. *N Engl J Med* 2011; 365: 1396–1405
- 12 *Nitz U, Maass N.* Leitlinien-Diagnostik und Therapie primärer und metastasierter Mammakarzinome – Bisphosphonate und der RANKL-Antikörper Denosumab. Arbeitsgemeinschaft für Gynäkologische Onkologie e.V. AGO; 2011
- 13 *Dachverband der deutschen Osteologie.* Prophylaxe, Diagnostik und Therapie der Osteoporose bei Erwachsenen. Arbeitsgemeinschaft der Wissenschaftlichen Medizinischen Fachgesellschaften – AWMF; 2010. [http://www.awmf.org/uploads/tx\\_szleitlinien/034-003\\_S3Prophylaxe\\_Diagnostik\\_und\\_Therapie\\_der\\_Osteoporose\\_bei\\_Erwachsenen\\_lang\\_10-2009\\_12-2012.pdf](http://www.awmf.org/uploads/tx_szleitlinien/034-003_S3Prophylaxe_Diagnostik_und_Therapie_der_Osteoporose_bei_Erwachsenen_lang_10-2009_12-2012.pdf); Stand: 26.02.2013
- 14 *Russell RG.* Bisphosphonates: the first 40 years. *Bone* 2011; 49: 2–19
- 15 *Coleman RE, McCloskey EV.* Bisphosphonates in oncology. *Bone* 2011; 49: 71–76
- 16 *Hadji P, Aapro MS, Body JJ et al.* Management of aromatase inhibitor-associated bone loss in postmenopausal women with breast cancer: practical guidance for prevention and treatment. *Ann Oncol* 2011; 22: 2546–2555
- 17 *Regan MM, Price KN, Giobbie-Hurder A et al.* Interpreting Breast International Group (BIG) 1-98: a randomized, double-blind, phase III trial comparing letrozole and tamoxifen as adjuvant endocrine therapy for postmenopausal women with hormone receptor-positive, early breast cancer. *Breast Cancer Res* 2011; 13: 209
- 18 *Llombart A, Frassoldati A, Pajja O et al.* Immediate administration of zoledronic acid reduces aromatase inhibitor-associated bone loss in postmenopausal women with early breast cancer: 12-month analysis of the E-ZO-FAST trial. *Clin Breast Cancer* 2012; 12: 40–48
- 19 *European Medicine Agency.* Withdrawal of Zometa-Letter. European Medicines Agency; 2010. [http://www.ema.europa.eu/docs/en\\_GB/document\\_library/Other/2011/01/WC500101331.pdf](http://www.ema.europa.eu/docs/en_GB/document_library/Other/2011/01/WC500101331.pdf); Stand: 26.02.2013
- 20 *Ritterhoff NL.* Wie gut kennen Patienten ihre Krankheit und Behandlung? Ein Vergleich von Patientenangaben, Arztangaben und Registerdaten in der onkologischen Versorgung. Lübeck: Medizinische Fakultät, Institut für Krebs epidemiologie e.V., Universität zu Lübeck; 2010
- 21 *Waldmann A, Dreckschmidt J, Pritzkeleit R et al.* Test-Retest Reliabilität des OVIS-Fragebogens – Ein Instrument zur Evaluation der onkologischen Versorgung aus Patientensicht. *Gesundheitswesen* 2010; 72: 707–713
- 22 *Slanger T, Mutschelknauss E, Kropp S et al.* Test-retest reliability of self-reported reproductive and lifestyle data in the context of a German case-control study on breast cancer and postmenopausal hormone therapy. *Ann Epidemiol* 2007; 17: 993–998
- 23 *Adelstein BA, Irwig L, Macaskill P et al.* A self administered reliable questionnaire to assess lower bowel symptoms. *BMC Gastroenterol* 2008; 8: 8
